# Supplementary material for: Nanoparticle heterojunctions in ZnS–ZnO hybrid nanowires for visible-light-driven photocatalytic hydrogen generation
Source: Royal Society of Chemistry journal article supplement (doi:10.1039/c3ce40523k), 2013-01-01
Supplement: c3ce40523k.pdf [file c3ce40523k.pdf]

## Nanoparticle Heterojunctions in ZnS/ZnO Hybrid Nanowires for Visible-Light-Driven Photocatalytic Hydrogen Generation

Zheng Wang,<sup>a</sup> Shao-wen Cao,<sup>a</sup> Say Chye Joachim Loo,<sup>a\*</sup> and Can Xue<sup>a\*</sup>

*Solar Fuels Laboratory, School of Materials Science and Engineering, Nanyang Technological University, 50 Nanyang Avenue, Singapore 639798, Singapore.*

*E-mail: cxue@ntu.edu.sg, joachimloo@ntu.edu.sg*

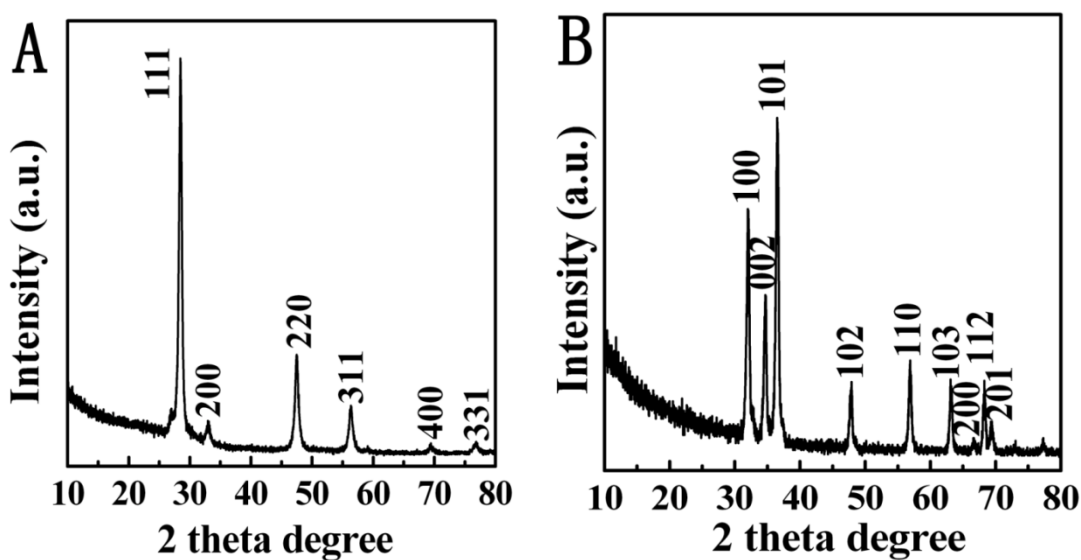

**Fig S1.** XRD patterns of commercial (A) ZnS and (B) ZnO.

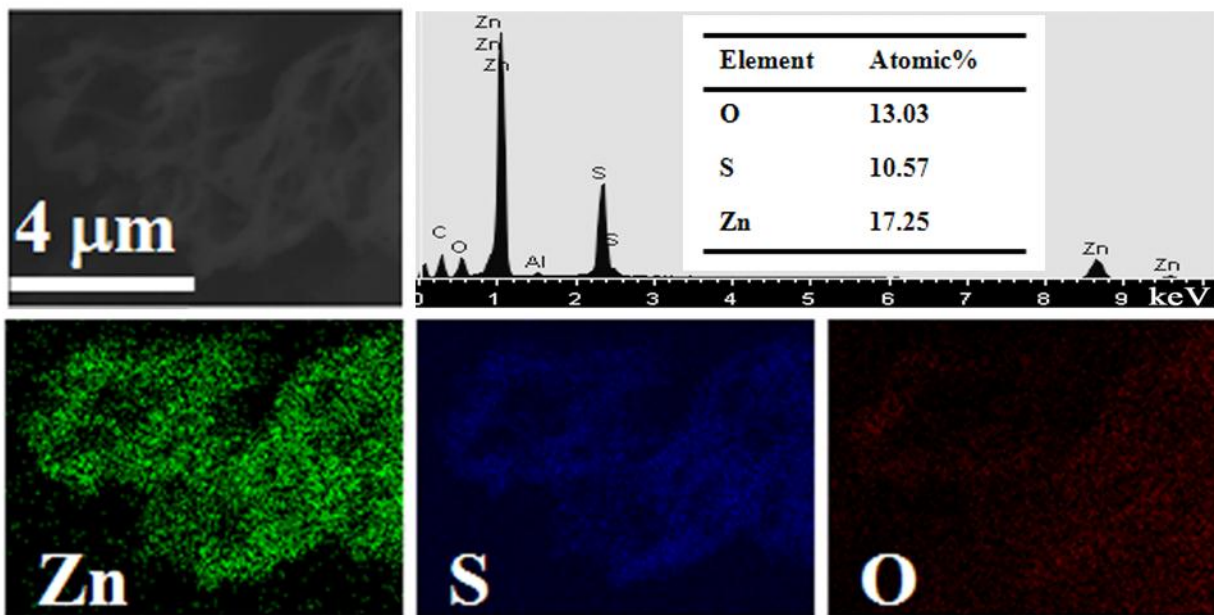

**Fig S2.** Elemental mapping of Zn, S and O in ZnS/ZnO hybrid nanowires.

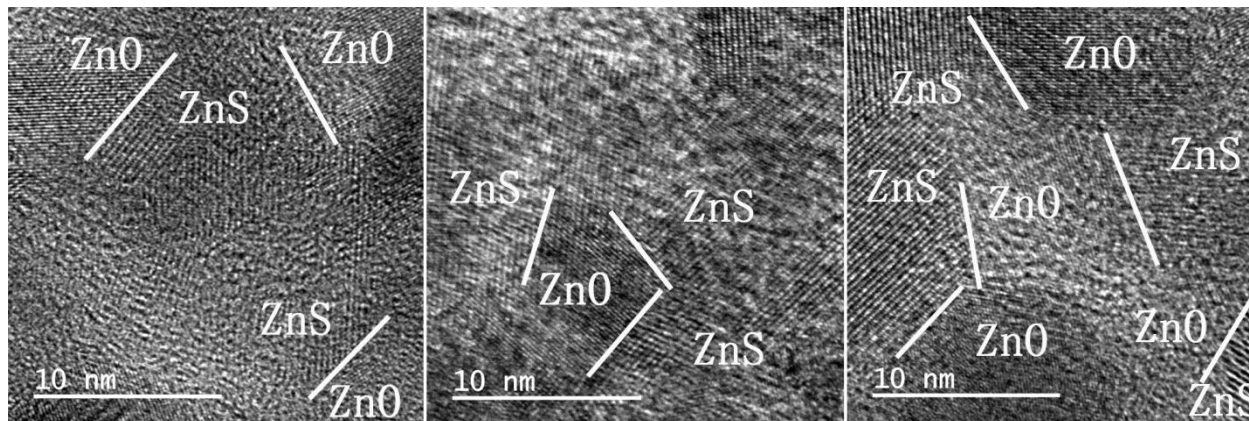

**Fig S3.** HRTEM images of ZnS/ZnO nanoheterostructure.

**Table S1** EDS elemental ratio of the ZnS/ZnO nanocomposites with different reaction time

| Sample | S:Zn Atomic% | ZnS: ZnO molar ratio |
|--------|--------------|----------------------|
| ZZ-10h | 0.570        | 1.33:1               |
| ZZ-15h | 0.568        | 1.31:1               |
